# Supplementary material for: A tuber mustard AP2/ERF transcription factor gene, BjABR1, functioning in abscisic acid and abiotic stress responses, and evolutionary trajectory of the ABR1 homologous genes in Brassica species
Source: PubMed Central journal article supplement (PMC6294115; doi:10.7717/peerj.6071), 2018-12-11
Supplement: peerj-06-6071-s001.pdf [file peerj-06-6071-s001.pdf]

|            |                                                                                                      |     |
|------------|------------------------------------------------------------------------------------------------------|-----|
| BjuA032667 | MALKVANQEGNVGKSEPTTREDDDHRTLSDIDQWLYSFSAEDDYL LHRDNSLTPPSSSLISREKEMSAIVSALTHVVAGNVPTROYGGEGETSNSSSS  | 100 |
| BjABR1     | MALKVANQEGNVGKSEPTTREDDDHRTLSDIDRWLYSFSAEDDYL LHRDNSLTPPSSSLISREKEMSAIVSALTHVVAGNVPTROYGGEGETSNSSSS  | 99  |
| Consensus  | malkvanqegnvvgkkaepttredddhrtlsdidqwllysfsaeddyl lhrdnsltpssslisrekemsaivsalthvvagnvptrqyggegetsns   |     |
| BjuA032667 | SGQKRRRELEEGGGGKDVKAANTLTVDQYFAGGSSSRVGEASNMSGSVPTYEYTTTPNANTETSLLSGDGPQRRYRGVQRPWGKWAAEIRDPFKAA     | 200 |
| BjABR1     | SGQKRRRELEEGGGGKDVKAANTLTVDQYFAGGSSSRVGEASNMSGSVPTYEYTTTPNANTETSLLSGDGPQRRYRGVQRPWGKWAAEIRDPFKAA     | 199 |
| Consensus  | sgqkrrreleeggggkdvkaantltvdqyfagssssrvgeassnmsgsvptyeytttppnantetsllsgdgpqrryrgvrqrpwgkwaaeirdpfkaa  |     |
| BjuA032667 | RVWLGTFDNAESAARAYDEAALRFRGNKAKLNFPENVKLVLPASTTPTLSVPQTAVQRPTQLRNSGSTSTILPVRHASDQNVHSQLLMQSYNFSYLELAH | 300 |
| BjABR1     | RVWLGTFDNAESAARAYDEAALRFRGNKAKLNFPENVKLVLPASTTPTLSVPQTAVQRPTQLRNSGSTSTILPVRHASDQNVHSQLLMQSYNFSYLELAH | 299 |
| Consensus  | rvwlgtdnaesaaraydeaalrfrgnkaklnfpenvklvrpasttptlsvpqtavqrptqlrmsgststilpvrhasdqnvhsqllmqsynfsylelah  |     |
| BjuA032667 | HQQQFQHQQQSLYDQVSFPLRFHGHTGGSTMQSTSTLSRSMFSPAAVQPKPESASETGHFLDQLGKASNNNNNNYNNSPS                     | 381 |
| BjABR1     | HQQQFQHQQQSLYDQVSFPLRFHGHTGGSTMQSTSTLSRSMFSPAAVQPKPESASETGHFLDQLGKASNNNNNNYNNSPS                     | 380 |
| Consensus  | hqqqfqbqqqslqdqvsfplrfghgthggstmqststlsrsmfspaavqpkpesasetghlfdqlgkasnnnnnnynnsps                    |     |
