# Supplementary material for: A tuber mustard AP2/ERF transcription factor gene, BjABR1, functioning in abscisic acid and abiotic stress responses, and evolutionary trajectory of the ABR1 homologous genes in Brassica species
Source: PubMed Central journal article supplement (PMC6294115; doi:10.7717/peerj.6071), 2018-12-11
Supplement: peerj-06-6071-s002.pdf [file peerj-06-6071-s002.pdf]

A

|            |                                                                                                           |     |
|------------|-----------------------------------------------------------------------------------------------------------|-----|
| BjuA032667 | GTATTTTTTCATTTTTTAAATAAACACACGCGTGGCAATCAGCTTAAGTTTGAATATCTCACGTGATGTATGTGTATATAAAAAGAAATGGTGGAT          | 100 |
| BjABR1     | GTATTTTTTCAGTTTTTAAATAAACACACGCGTGGCAATCAGCTTAAGTTTGAATATCTCACGTGATGTATGTGTATATAAAAAGAAATGGTGGAT          | 100 |
| Consensus  | gtatTTTTTCagTTTTTaaataaacacacgCGTggcaaatcagcttaagTTTgaattatctcacgtgatgtatgtgtatataaaaagaatggTggat         |     |
| BjuA032667 | TCTCAAAACACAAAAACTATTTTTCCCTCAATTTTGTCAAACCTCAAATGAATCTTGAGATTTTGAAAAACATTTATGATAAATGTTTTAATAAATTTGT      | 200 |
| BjABR1     | TCTCAAAACACAAAAACTATTTTTCCCTCAATTTTGTCAAACCTCAAATGAATCTTGAGATTTTGAAAAACATTTATGATAAATGTTTTAATAAATTTGT      | 200 |
| Consensus  | tctcaaaacacaaaaactatTTTTccctcaatTTTTgtcaaaactcaaatgaatcttgagatTTTgaaaacatttatgataaatgTTTaaataaaatTTgt     |     |
| BjuA032667 | GATGTGGTATATATTATATACATCAAGTGTATGAGTCACATCATATAAAAACACAAAATCTAAATATTTGCTCTTTTGTGTGTTTATTTGTTTAAATTTT      | 300 |
| BjABR1     | GATGTGGTATATATTATATACATCAAGTGTATGAGTCACATCATATAAAAACACAAAATCTAAATATTTGCTCTTTTGTGTGTTTATTTGTTTAAATTTT      | 300 |
| Consensus  | gatTggatataattattatatacatcaagTgtatgagTcacatcatataaaaacacaaaatctaaatattTgctctTTTgtTgtgTttatTTgtTtaattTT    |     |
| BjuA032667 | AATGAAAAAGTTGCTCTTTTTTTCACACTCAGCAATATACAAAATTAACCGCAATTTTTTTTGTCTTCCCTAGAAAATCCATGAGTCTTTTCAT            | 400 |
| BjABR1     | AATGAAAAAGTTGCTCTTTTTTTCACACTCAGCAATATACAAAATTAACCGCAATTTTTTTTGTCTTCCCTAGAAAATCCATGAGTCTTTTCAT            | 400 |
| Consensus  | aatgaaaaaagTtGctctTTTTTtgcactcagcaaatatacaaaaatTaaCCGcaatTTTTTTTgcttcccttagaaaatccatgagTctTTTCat          |     |
| BjuA032667 | AAATGAGTAGTTTTTTTCCACAGGACTAACAAGAACAATGCATATACAGTTTCCAAGTGTTTTTTTTTGAAAAAATGGTTAATATTTCTTAAAT            | 500 |
| BjABR1     | AAATGAGTAGTTTTTTTCCACAGGACTAACAAGAACAATGCATATACAGTTTCCAAGTGTTTTTTTTTGAAAAAATGGTTAATATTTCTTAAAT            | 499 |
| Consensus  | aaatgagtagTTTTTTTccacaggactaaCGaagaacaatgcataatacaggtTccaagTgtTTTTTTTgaaaaatggTtTaatattctTaaat            |     |
| BjuA032667 | AGTTTACGAAAGTGTACTTGATTACAGAAAGACATATACCTTTGGGATTTAACAATAAGGTCGGACAATTAACATATAGTGAATAGTGTATGATGATAT       | 600 |
| BjABR1     | AGTTTACGAAAGTGTACTTGATTACAGAAAGACATATACCTTTGGGATTTAACAATAAGGTCGGACAATTAACATATAGTGAATAGTGTATGATGATAT       | 599 |
| Consensus  | agTTTAcgaaagTgtactTgattaccagaagacataactTTgggattataacaataaagTcggacaattaaactatagTgaattagTgatgatgat          |     |
| BjuA032667 | GCCAAAAGAACTCTATCTCCCTCCATTTGCATAAAAAGTCATTTTCCACTTGCATTTTGTTTTACTACTTGTGCATTGCCCCTTTGTCAACCCATTTGGCCTAAT | 700 |
| BjABR1     | GCCAAAAGAACTCTATCTCCCTCCATTTGCATAAAAAGTCATTTTCCACTTGCATTTTGTTTTACTACTTGTGCATTGCCCCTTTGTCAACCCATTTGGCCTAAT | 699 |
| Consensus  | gcaaaaagaactctatctccctccattTgcataaaaagTcattttccactTgcatTTTgtTtactactTgtgcattTgcccctTgtcaccctattTggcctaat  |     |
| BjuA032667 | CACTTTGTGTAATCACTGAACACTCCTTTTGAATTTGTTTTGTTTTTAAGGACTTTCCTTTATAATATCATTTATTTGACTAGATTTAAAGAGAGTTAT       | 800 |
| BjABR1     | CACTTTGTGTAATCACTGAACACTCCTTTTGAATTTGTTTTGTTTTTAAGGACTTTCCTTTATAATATCATTTATTTGACTAGATTTAAAGAGAGTTAT       | 799 |
| Consensus  | caCTTTgtGtaactcagcaactcctTTTgattTgtTTTTgTTTTaaGGactTtCctTTtataatATcattTattTgactagattTaaagagagTtat         |     |
| BjuA032667 | TAGTGAGCTAAAACAAAAGTTGAAATTTATATGTTTTATGTTTGTGTTTCCCA                                                     | 854 |
| BjABR1     | TAGTGAGCTAAAACAAAAGTTGAAATTTATATGTTTTATGTTTGTGTTTCCCA                                                     | 853 |
| Consensus  | tagTgagctaaaacaaaagTTGaatttatatgTTTTatgTtTgtTgtTtccca                                                     |     |

B

|            |                                                                                                         |      |
|------------|---------------------------------------------------------------------------------------------------------|------|
| BjuA032667 | TCACTTTTAAAGTTTATGAGGTTGGTTAAACGTATAAAACATTTAGACCGGAGAAAAGAAAATCGAAAACGGAAGAATATTTCTGGGTCAAACGGTCGAA    | 100  |
| BjABR1     | .CATCTTTTAAAGTTTATGAGGTTGGTTAAACGTATAAAACATTTAGACCGGAGAAAAGAAAATCGAAAACGGAAGAATATTTCTGGGTCAAACGGTCGAA   | 99   |
| Consensus  | tcatctTTTaaagTtTatTgaggtTggcaaacgtataaaacattTAgaccggagaaaagaaaatcgaaaacgagaatattctTgggtcaaacggTcgaa     |      |
| BjuA032667 | GACAAAATGAAAGACGAAGCTTGAAACAAGTGGGCTGTAGGTACGGCCAGAAAAGGCATGTGCTTTGGCCCTTTCACCCACACCGTCCGAACGAAGCA      | 200  |
| BjABR1     | GACAAAATGAAAGACGAAGCTTGAAACAAGTGGGCTGTAGGTACGGCCAGAAAAGGCATGTGCTTTGGCCCTTTCACCCACACCGTCCGAACGAAGCA      | 199  |
| Consensus  | gacaaaatgaaagacgaagctTgaaacaagTgggctgtaggtAcggccagaaaagGCatgtGctTTggccctTTCaccCCacCCGTCcgaacgaagca      |      |
| BjuA032667 | TTTGACCTCGGCGTGAACCAACACCGGACTCGTGAGAGAACCGCGTTTGTACAGCACGGCTTCTCTCTCAACTTGACCTTCAAGCTCACCGATTAGACA     | 300  |
| BjABR1     | TTTGACCTCGGCGTGAACCAACACCGGACTCGTGAGAGAACCGCGTTTGTACAGCACGGCTTCTCTCTCAACTTGACCTTCAAGCTCACCGATTAGACA     | 299  |
| Consensus  | TTTgacgtcggcgTgaaccAACaccggactcgtgagagaacCGctTTTgtAcagCACggctTctctctcaactTgacctTcaagctcaccgattagaca     |      |
| BjuA032667 | AATAATAATATTTCAATTAATGTTTTTACCTATTTTTCAGCAGTTCATTCTTATAATTAGTTATTAATCACCGAACCATATAATAATTTAATATCAGT      | 399  |
| BjABR1     | AATAATAATATTTCAATTAATGTTTTTACCTATTTTTCAGCAGTTCATTCTTATAATTAGTTATTAATCACCGAACCATATAATAATTTAATATCAGT      | 399  |
| Consensus  | aaataaataattTcaattaaTgTTTTacctattTTTcagcagTtCattctTataattagTtattaatcaccgaaccataataaattTaatatcagt        |      |
| BjuA032667 | GTCTTAATGCTCCGATTTTAGCAATGTTTGTATTTTGTGTTTTAAAGTAGTAGTATATGTTTTGGAATTTTCAAAATCGATATAAAATCATTTGTT        | 499  |
| BjABR1     | GTCTTAATGCTCCGATTTTAGCAATGTTTGTATTTTGTGTTTTAAAGTAGTAGTATATGTTTTGGAATTTTCAAAATCGATATAAAATCATTTGTT        | 499  |
| Consensus  | gtctTaatgctccgattTTtagcaatgTtTgtattctTTTgtTTTTaaagtagtagTatattgTTTTggaattTTcaaaatcgataTaaatcattTgtt     |      |
| BjuA032667 | TAAAGAAATTTTAGGAATTAGCAATTTAATCTATCGTCTAATAAAAATACATAGAAAACGTAATAAATAAAGTTAATAACTTTTTTATGCAACTGTTTAA    | 599  |
| BjABR1     | TAAAGAAATTTTAGGAATTAGCAATTTAATCTATCGTCTAATAAAAATACATAGAAAACGTAATAAATAAAGTTAATAACTTTTTTATGCAACTGTTTAA    | 599  |
| Consensus  | taaagaattTTtaggaattagcaattTaaactatcgtctataaaaatAcatagaaaacgTaaaataaagTtaataactTTTTtatgcaactTgtTta       |      |
| BjuA032667 | ACTAAATAACACTATCATGCTATAGTGTATAGAATCCCCCCCCCTCCCGAGCTTAAACTTTACTTAATAGATGTAGTCAATTAGGTTCTGTTAAG         | 699  |
| BjABR1     | ACTAAATAACACTATCATGCTATAGTGTATAGAATCCCCCCCCCTCCCGAGCTTAAACTTTACTTAATAGATGTAGTCAATTAGGTTCTGTTAAG         | 699  |
| Consensus  | actaaataaactatcatgctatagTgtatagaatccccccccctcccgagctTaaactTtacttaattagatgtagtcaattaggTtctgTTaag         |      |
| BjuA032667 | TTTTGATTAACAGTTAGCTGTTTACATTACATGTCGATGCAATTAAGTATCATGTCGATGCAATTAAGTATCACCCACAAGTTGCAAAAAGTTTTCAGATCCG | 799  |
| BjABR1     | TTTTGATTAACAGTTAGCTGTTTACATTACATGTCGATGCAATTAAGTATCATGTCGATGCAATTAAGTATCACCCACAAGTTGCAAAAAGTTTTCAGATCCG | 799  |
| Consensus  | TTTTgatTaaCagTtagctgtTtcaattacatgTcGatgcaattaaGtatcatgTcGatgcaattaaGtatcaccCaagTgcaaaagTtTcagatccg      |      |
| BjuA032667 | TTTCATATAATCCAATTCATATGACCAGAATCATCAAAACCAAGTTTCCCTTTTCGTTAGTATAGTTCAAAATTTATAATATAAAGTTATTTACTTTATTTT  | 899  |
| BjABR1     | TTTCATATAATCCAATTCATATGACCAGAATCATCAAAACCAAGTTTCCCTTTTCGTTAGTATAGTTCAAAATTTATAATATAAAGTTATTTACTTTATTTT  | 899  |
| Consensus  | tttcatataatccaattcatattgaccagaatcatcaaaacCaagTtTccctTtTcgTtagtatagTtcaaatTTataataaagTtattTactttatTTt    |      |
| BjuA032667 | ATAATATACTATATTTAAACTTTAAAAGTGTATGTTTTACATTCACACGACCAGAACAGAGAGCAGCCGACTTTTCATTTGGCGGCGTGTAGCTAAGA      | 999  |
| BjABR1     | ATAATATACTATATTTAAACTTTAAAAGTGTATGTTTTACATTCACACGACCAGAACAGAGAGCAGCCGACTTTTCATTTGGCGGCGTGTAGCTAAGA      | 999  |
| Consensus  | ataataatactatattTaaactTTaaaagTgtatgTTTTacattcAcacgaccgaaacagagagcagccgactcttTcattTggcgGcgTgagctAaga     |      |
| BjuA032667 | CCAGGGTTTTACACAATAAAAAATTTCTATATCTACAGCTTAAACCTTATTTCTTTGCTTAAAGAAAAGAACATCTGATAAAACTCTCTCTCTCTCT       | 1099 |
| BjABR1     | CCAGGGTTTTACACAATAAAAAATTTCTATATCTACAGCTTAAACCTTATTTCTTTGCTTAAAGAAAAGAACATCTGATAAAACTCTCTCTCTCTCT       | 1099 |
| Consensus  | caagggTTTTacacaataaaaaattTctatctacagctTaaacctattctTgtctTaaGaaaagaacatctgataaaactctctctctctct            |      |
| BjuA032667 | CTGCAGAGTTTTCTTCCCTCTTAAAGAAAATAAATATTTTCTTTTCTTTTTTAAATTTGTTGTTTATAAGTGCAGTTTCAGACAAGGATTATA           | 1199 |
| BjABR1     | CTGCAGAGTTTTCTTCCCTCTTAAAGAAAATAAATATTTTCTTTTCTTTTTTAAATTTGTTGTTTATAAGTGCAGTTTCAGACAAGGATTATA           | 1199 |
| Consensus  | ctgcagagTTTTctTccctctTaaGaaaataaattTTctctTTTctTTTTTaaattTgtggTtataagctgcaagTtTcagacaagGattata           |      |
| BjuA032667 | AGGAGAGAATTG                                                                                            | 1211 |
| BjABR1     | AGGAGAGAATTG                                                                                            | 1211 |
| Consensus  | aggagagaattg                                                                                            |      |
