# Supplementary material for: A tuber mustard AP2/ERF transcription factor gene, BjABR1, functioning in abscisic acid and abiotic stress responses, and evolutionary trajectory of the ABR1 homologous genes in Brassica species
Source: PubMed Central journal article supplement (PMC6294115; doi:10.7717/peerj.6071), 2018-12-11
Supplement: peerj-06-6071-s007.pdf [file peerj-06-6071-s007.pdf]

|               |                                                                                                       |      |
|---------------|-------------------------------------------------------------------------------------------------------|------|
| BniB045887-PA | GTGGTAATAATAATAACAACTATAAGAATAGTCCATCCTCATGTCGAACGGCTTACTTCTGTGTTTTTTTTCCCTTAGTATAGTGTATGTATAG        | 100  |
| BjuB007684    | GTGGTAATAATAATAACAACTATAAGAATAGTCCATCCTCATGTCGAACGGCTTACTTCTGTGTTTTTTTTCCCTTAGTATAGTGTATGTATAG        | 100  |
| Consensus     | gttggtaataataataaactataagaatagtcctatcctcatgatcgaaacggcttacttctgtgttttttttcccttagtatagtgttatgttatag    |      |
| BniB045887-PA | AAAGAGAAAAA...AAAGATTAGTTATAGCTTATTATAGTGTAGGTTTTGTATTATTTTTTTCTTTTCAGTTTTATCATAATTTGTATAAT           | 200  |
| BjuB007684    | AAAGAGAAAAA...AAAGATTAGTTATAGCTTATTATAGTGTAGGTTTTGTATTATTTTTTTCTTTTCAGTTTTATCATAATTTGTATAAT           | 196  |
| Consensus     | aaaagagaaaaaaagattagttatagcttattatagtggttttaggttttgtattattttttttcttttcagttttatcataaatttggataat        |      |
| BniB045887-PA | AATTCGTTGTAAAAA...TCATAAGCAATAGTGGAAAAAATTAAGAGTTGTGTTTATGCTTTAAAAGGTTCCCTAATATCACACACAAAAGGAAAGAAA   | 299  |
| BjuB007684    | AATTCGTTGTAAAAA...TCATAAGCAATAGTGGAAAAAATTAAGAGTTGTGTTTATGCTTTAAAAGGTTCCCTAATATCACACACAAAAGGAAAGAAA   | 296  |
| Consensus     | aattcgttgtaaaaaatcataaggaaatagtggaaaaaaattaaagagttgtgtttatgctttaaaaggttccctaatatcacacacaaaagggaaagaaa |      |
| BniB045887-PA | AATTCGAAGGTATCATGTATGCGAAGTGTGAAGTTGTGAACCAACAAAGACAACAAAACATAACGAAAGAATTTAGGACAGTGACAACAACCTGGCCC    | 399  |
| BjuB007684    | AATTCGAAGGTATCATGTATGCGAAGTGTGAAGTTGTGAACCAACAAAGACAACAAAACATAACGAAAGAATTTAGGACAGTGACAACAACCTGGCCC    | 396  |
| Consensus     | aattcgaaggtatcatgtatgcaaacgtgtgaagttgtgaaccaaacaaagacaacaaaactatacgaagaattttaggacagtgacaacaacttggccc  |      |
| BniB045887-PA | ATTTAGGAAACACCTGGCCCATAAAGTTGATGCTTTGGACTATATTGTTGCGGAGATTTTGATTATGATTTAAAGCATCCACATTGGGGTTTATAG      | 499  |
| BjuB007684    | ATTTAGGAAACACCTGGCCCATAAAGTTGATGCTTTGGACTATATTGTTGCGGAGATTTTGATTATGATTTAAAGCATCCACATTGGGGTTTATAG      | 472  |
| Consensus     | atthagaaacacctggcccataaagttgatgctcttggactatattgttgcgggagaatttgattatgatctcaagagcatccacattggggttatag    |      |
| BniB045887-PA | AGGAGGTTCCACACAGAAATCAAGAAAAA...AATCAATAAATCATATGAACCTTCTCTTCCCTAAAGTTCTTTCCGGTTGAACCCCTCTCTCTGAAGT   | 599  |
| BjuB007684    | AGGAGGTTCCACACAGAAATCAAGAAAAA...AATCAATAAATCATATGAACCTTCTCTTCCCTAAAGTTCTTTCCGGTTGAACCCCTCTCTCTGAAGT   | 472  |
| Consensus     | aggaggttcacacagaaatcaagaaaaaa...aataaataatcatatgaacttctcttccctaaagttcttccggttgaacccctctctctgaagt      |      |
| BniB045887-PA | TCATCACTGTAGCGTGGCCCCACGATCGTGGCGGCCACGATTGGTCTAAGTTTTTTTTTTTTTAAAAAACAATTAAGAAAAAGAAAAAGTT           | 699  |
| BjuB007684    | TCATCACTGTAGCGTGGCCCCACGATCGTGGCGGCCACGATTGGTCTAAGTTTTTTTTTTTTTAAAAAACAATTAAGAAAAAGAAAAAGTT           | 472  |
| Consensus     | tcatcactgtagcgtggccccacgatcgtggcggccacgattggtctaaagtttttttttttaaaaaacaattaaagaaaaagaaaaagtt           |      |
| BniB045887-PA | TAATAATAAAAAATTAAGAGATGAATCCCAAGAGGAAGTTCATTGACGTGGGTGCTCTAACTATCGTGGAAATAATCAAGTAGGATTATGAATATTGAT   | 799  |
| BjuB007684    | TAATAATAAAAAATTAAGAGATGAATCCCAAGAGGAAGTTCATTGACGTGGGTGCTCTAACTATCGTGGAAATAATCAAGTAGGATTATGAATATTGAT   | 511  |
| Consensus     | taataataaaaaattaaagatgaatccaagaggaagttcattgacgtgggtgctctaactatcgtggaaaatcaagtaggatattgaatattgat       |      |
| BniB045887-PA | TGATAAAAGTTATTTTACTCAGGAAGCCCTTTCTCAAAAA...GTTATTTTACTCTAATCTGTGGATTATCAAGAATAATTTTCAGATCCCCATCCC     | 898  |
| BjuB007684    | TGATAAAAGTTATTTTACTCAGGAAGCCCTTTCTCAAAAA...GTTATTTTACTCTAATCTGTGGATTATCAAGAATAATTTTCAGATCCCCATCCC     | 611  |
| Consensus     | tgataaaagttatTTTTACTCAGGAAGCCCTTTCTCAAAAAAGTTATTTTACTCTAATCTGTGGATTATCAAGAATAATTTTCAGATCCCCATCCC      |      |
| BniB045887-PA | AAATATTTTCTGGTTATCGTCCAATATTTT...TAGAGAATTTGCTAAGTCTTATATGTACCGTAATATTATGACATGCAATATTCATATATATACA     | 998  |
| BjuB007684    | AAATATTTTCTGGTTATCGTCCAATATTTT...TAGAGAATTTGCTAAGTCTTATATGTACCGTAATATTATGACATGCAATATTCATATATATACA     | 711  |
| Consensus     | aaatattttctggttatcgtccaattatTTTTTAGAGAATTTGCTAAGTCTTATATGTACCGTAATATTATGACATGCAATATTCATATATATACA      |      |
| BniB045887-PA | CTTCATTTTTGTCTGCGAAAACTATGAAAGATA...GATTTTCTTTTGGCATCATGAAAGATAAGATTACTGTACTGTAAATCCCGTATATAAAATA     | 1097 |
| BjuB007684    | CTTCATTTTTGTCTGCGAAAACTATGAAAGATA...GATTTTCTTTTGGCATCATGAAAGATAAGATTACTGTACTGTAAATCCCGTATATAAAATA     | 811  |
| Consensus     | cttcatttttctgctgcgaaaaactatgaaagataagatttcttttggcatcatgaaagataagattactgtactgttaattccgatatataaaata     |      |
| BniB045887-PA | AAATTTTGTGATTTTTAAACATTTACATGAACGGATGAGTATTTCTCTAAATCTCTAATATATTTTCTTACCTAATTTCTCAGGAGAATGCGTAATATAA  | 1197 |
| BjuB007684    | AAATTTTGTGATTTTTAAACATTTACATGAACGGATGAGTATTTCTCTAAATCTCTAATATATTTTCTTACCTAATTTCTCAGGAGAATGCGTAATATAA  | 911  |
| Consensus     | aatTTTGTGATTTTTAAACATTTACATGAACGGATGAGTATTTCTCTAAATCTCTAATATATTTTCTTACCTAATTTCTCAGGAGAATGCGTAATATAA   |      |
| BniB045887-PA | TGACAACAAAAGAAAACATAGAAAGAGATGAGAGAATCTCTTT...CGTCTCTTTTCTCTCTGTGACTTCTCATTCTATGTATCAACATTTTGTTTCCG   | 1297 |
| BjuB007684    | TGACAACAAAAGAAAACATAGAAAGAGATGAGAGAATCTCTTT...CGTCTCTTTTCTCTCTGTGACTTCTCATTCTATGTATCAACATTTTGTTTCCG   | 1011 |
| Consensus     | tgacaacaaaagaaaacatagaaagagatgagagaatctctttccgtctcttttctctctgtgacttctcattctatgtatcaacatttgttttccg     |      |
| BniB045887-PA | TGAGTGAATTAGTTAGATAAGCTTTAATTACACTTTTCGGTGATGTATAAACCTTATTATCATCAAAAGTTTTTTAATTTTTTTTCTTGACCCATGT     | 1396 |
| BjuB007684    | TGAGTGAATTAGTTAGATAAGCTTTAATTACACTTTTCGGTGATGTATAAACCTTATTATCATCAAAAGTTTTTTAATTTTTTTTCTTGACCCATGT     | 1111 |
| Consensus     | tgagtgaattagttagataagctttaattacacttttccggtgatgtataaaccttattatcatcaaaagtttttaatttttttcttgaccatgt       |      |
| BniB045887-PA | AGATGCAATAGGTTTGTGTTGGTTCTAATTAGGAATCAAGCATAGATTTGTGACTTTTCAAATCTTGGTTTTTTTATGAAATGTTTTAATGCAAGTATTA  | 1496 |
| BjuB007684    | AGATGCAATAGGTTTGTGTTGGTTCTAATTAGGAATCAAGCATAGATTTGTGACTTTTCAAATCTTGGTTTTTTTATGAAATGTTTTAATGCAAGTATTA  | 1211 |
| Consensus     | agatgcaataggtttgttggttctaaattaggaatcaagcatagatttgtgacttttcaaacttgggttttttaagaaatgttttaaagcaagtatta    |      |
| BniB045887-PA | TAAGTACAATATATGAAGTATTTTACAAGAAATGAAGTTTCATGCTACAAAAGAAAGACTAATTTCTATTTCATCGTTTGTATGTCATAAACAATTTTG   | 1596 |
| BjuB007684    | TAAGTACAATATATGAAGTATTTTACAAGAAATGAAGTTTCATGCTACAAAAGAAAGACTAATTTCTATTTCATCGTTTGTATGTCATAAACAATTTTG   | 1311 |
| Consensus     | taagtacaatataatgaagtattttacaagaaatgaagtttcatgctacaaaagaaagactaattctattctatcgtttgattgtcataaacaatatttg  |      |
| BniB045887-PA | TGCACAAAAATAGATATATACAAGGCGTCATCGGTCTCCATTCTTATATGTGGAGTTCTCCGCATTTCTTATATGTAATTTAAGGCACGATTAGCA      | 1696 |
| BjuB007684    | TGCACAAAAATAGATATATACAAGGCGTCATCGGTCTCCATTCTTATATGTGGAGTTCTCCGCATTTCTTATATGTAATTTAAGGCACGATTAGCA      | 1411 |
| Consensus     | tgacaaaaatagatatatacaaggcgtcatcggctccatttcttatatgtggagttctccgcatttcttatatgtaattttaaagcacgattagca      |      |
| BniB045887-PA | GCAGTTGATTTCCATCTGGTTCTAACTACAGCCATAGCGCTGTGGCGTTGGTGAACCTCTGTCTGAGCTGCTCTCTGCAAGCG...TCGCGCTCTCAACC  | 1795 |
| BjuB007684    | GCAGTTGATTTCCATCTGGTTCTAACTACAGCCATAGCGCTGTGGCGTTGGTGAACCTCTGTCTGAGCTGCTCTCTGCAAGCG...TCGCGCTCTCAACC  | 1511 |
| Consensus     | gcagttgatttccatctggttctaaactacagccatagcgtgtggcgttgggtaaacctctgtctgagctgctctctgcaagcggctcgccgtctcaacc  |      |
| BniB045887-PA | GGGACCGATCTCTCAAGCAGTCGCCGCTCTGAGCCGGACCGATCCCGCAATATCTTGGTACTCCAAGCGGTCCAACACCACTA                   | 1880 |
| BjuB007684    | GGGACCGATCTCTCAAGCAGTCGCCGCTCTGAGCCGGACCGATCCCGCAATATCTTGGTACTCCAAGCGGTCCAACACCACTA                   | 1596 |
| Consensus     | gggaccgatctctcaagcagtcgccgctctgagccggaccgatcccgcaatatcttggactccaagcgggtccaacaccacta                   |      |
