# Supplementary material for: A tuber mustard AP2/ERF transcription factor gene, BjABR1, functioning in abscisic acid and abiotic stress responses, and evolutionary trajectory of the ABR1 homologous genes in Brassica species
Source: PubMed Central journal article supplement (PMC6294115; doi:10.7717/peerj.6071), 2018-12-11
Supplement: peerj-06-6071-s010.pdf [file peerj-06-6071-s010.pdf]

|                     |                                                                                                        |     |
|---------------------|--------------------------------------------------------------------------------------------------------|-----|
| GSBRNA2T00134741001 | ATGATCAAACGAAACCGGGGAGAACCCCTGCTGTGATGGCCGGGAAGACGATGTGACGGAATCATCCCTTCTCAGAAACAAAAGCTGGCGAAGAAGTGTGT  | 98  |
| Bo1015899           | ATGATCAAACGAAACCGGGGAGAACCCCTGCTGTGATGGCCGGGAAGACGATGTGACGGAATCATCCCTTCTCAGAAACAAAAGCTGGCGAAGAAGTGTGT  | 100 |
| Consensus           | atgatcaaacgaaacccgggagaaaccccgcggtgatggccgggaagacgatgtgacggaatcatcccttctcagaaacaaaagccggcggaagaagtgtgt |     |
| GSBRNA2T00134741001 | GAGAACCACCCTTCTGGAGTCAAAGGCCAAACITTCGGAAGACTTAACCGGAATAATCCGTGTGATGGGAACAAGTCGGCGAAAACCTCCCGGAAAGA     | 198 |
| Bo1015899           | GAGAACCACCCTTCTGGAGTCAAAGGCCGAACITTCGGAAGACTTAACCGGAATAATCCGTGTGATGGGAACAAGTCGGCGAAAACCTCCCTGAAAGA     | 200 |
| Consensus           | gagaaccacccttctggagtcaaaagccaaaccttcgaaagacttaaccggaataatccggtgatgggaacaagtcggcgaaaaactccccgaaaga      |     |
| GSBRNA2T00134741001 | TTGAATTTTGATAAGAAGAAGAGAAATTGAGAAAGAGAGAAGCCGACACAATCATCAAACCAAGTTTCCTTTTCGTTATGATAAAAAGTTATTTACTTTA   | 298 |
| Bo1015899           | TTGAATTTTGATAAGAAGAAGAGAAATTGAGAAAGAGAGAAGCCGACACAATCATCAAACCAAGTTTCCTTTTCGTTATGATAAAAAGTTATTTACTTTA   | 300 |
| Consensus           | ttgaattttgataagaagaagagaaattgagaaagagagaagccgacacaatcatcaaaaccaagtttcttttcgttatgataaaaagttatttacttta   |     |
| GSBRNA2T00134741001 | TTTATAATTTACTATATTTAAAACCTTTAAAAGTGTATGTTTTACATTCACACGACCGAAACAGAGAGCAGCCGACTCTTTCATTTGGCGCGCTGAGCTA   | 398 |
| Bo1015899           | TTTATAATTTACTATATTTAAAACCTTTAAAAGTGTATGTTTTACATTCACACGACCGAAACAGAGAGCAGCCGACTCTTTCATTTGGCGCGCTGAGCTA   | 400 |
| Consensus           | tttataatttactatattttaaacttttaaagtgatgttttacattcacacgaccgaaacagagagcagccgactctttcatttggcggcgctgagcta    |     |
| GSBRNA2T00134741001 | AGAAAAGGGTTTTACACGATAAAAAATATTTCTATATCTATCAGCTTAAACCTTATTTCTTTGTCTTAAGAACATCTGATAAACTCTGTCTCTCTCAACAG  | 498 |
| Bo1015899           | AGAAAAGGGTTTTACACGATAAAAAATATTTCTATATCTATCAGCTTAAACCTTATTTCTTTGTCTTAAGAACATCTGATAAACTCTGTCTCTCTCAACAG  | 500 |
| Consensus           | agaaaagggttttacacgataaaaaatatttctatatctatcagcttaaaccttatctttgtcttaagaacatctgataaaactctgtctctctcaacag   |     |
| GSBRNA2T00134741001 | AGATTTCTTTCCCTCTAAGAAAAATAATAATTTCTTTTTCTTTTTTATTTGTGGGTTTATAAGCTTCAAGTTTCAGACAAGGATTATAG.....         | 589 |
| Bo1015899           | AGATTTCTTTCCCTCTAAGAAAAATAATAATTTCTTTTTCTTTTTTATTTGTGGGTTTATAAGCTTCAAGTTTCAGACAAGGATTATAGGGAGAGAAT     | 600 |
| Consensus           | agatctctttccctctaagaaaaataataatcttttcttttttatttgtgggtttataagcttcaagtttcagacaaggattatagggagagaat        |     |
| GSBRNA2T00134741001 | ..                                                                                                     | 589 |
| Bo1015899           | TG                                                                                                     | 602 |
| Consensus           | tg                                                                                                     |     |
