# Supplementary material for: A tuber mustard AP2/ERF transcription factor gene, BjABR1, functioning in abscisic acid and abiotic stress responses, and evolutionary trajectory of the ABR1 homologous genes in Brassica species
Source: PeerJ. 2018 Dec 11;6:e6071. doi: 10.7717/peerj.6071 (PMC6294115; doi:10.7717/peerj.6071)
Supplement: Supplemental Information 5 — F, Forward primer; R, reverse primer. [file peerj-06-6071-s005.xlsx]

## Sheet: Sheet1
Table S1. Sequences of primers used for qRT-PCR and semi-quantitative analysis. F, Forward primer; R, reverse primer.
	Gene Name	Sequence (5′ to 3′)
qRT-PCR	BjABR1	F: ATTTCGCAGGCGGTAGTTCT
		R: TCGGTATTCGCATTTGGTGT
	18S rRNA (Tuber mustard)	F: TCTGACGCAAGCACAACTA
		R: TCTTCTCAGCTTTAGCCATT
	RD29B	F: AAGATTTTCCGACAAGAGGTGAT
		R: TTGGGACGAGATAGTTCTGGTGA
	RD22	F: GTGGCTAAGAAGAACGCACCGAT
		R: TGGCATACCGCAACTGCTTTAG
	ABI3	F: ACGGGAGGGACCTGGATGTAT
		R: CCGGCAAGTGTGTCTCAGCT
	18S rRNA (Arabidopsis)	F: CGTCCCTGCCCTTTGTACAC
		R: CGAACACTTCACCGGATCATT
semi-quantitative analysis	Actin3	F: GGCTACTCTTTCACCACGAC
		R: GGATACCAGCATTCTCCATAC
	BjuA008532	F: GCCGTTGATGCATGAGTCCTA
		R: CGGAGTGTTATTGTGTTTATTGTTATG
	BjuA008665	F: CAGCAAACAACTGCTGT
		R: ACTCGGTTGAACCGCTGCT
	BjuA023050	F: CCTGCTTCAGAGCAAATAG
		R: ACTATTACTATAGTTATTATTGT
	BjuA032667	F: TCAACCACTCCAACACTAT
		R: CCTAATGACTGTAGATCAAAC
	BjuB001787	F: GGTTCTACTACAAGTACGCT
		R: ACTAGACGATGACGTGGACAG
	BjuB007684_correction	F: TCAACTGCATCAACGCAAC
		R: GTTGTTATTATTATTACCAAC
