# Supplementary material for: A tuber mustard AP2/ERF transcription factor gene, BjABR1, functioning in abscisic acid and abiotic stress responses, and evolutionary trajectory of the ABR1 homologous genes in Brassica species
Source: PeerJ. 2018 Dec 11;6:e6071. doi: 10.7717/peerj.6071 (PMC6294115; doi:10.7717/peerj.6071)
Supplement: Supplemental Information 9 — (A) Sequence alignment between the intron of Bo9g018330.1 and the second intron of GSBRNA2T00134741001. (B) Sequence alignment between the first exon of Bo9g018330.1 and the second exon of GSBRNA2T00134741001. (C) the second exon of Bo9g018330.1 and the third exon of GSBRNA2T00134741001. Nucleotides conserved in two sequences are showed in dark gray. [file peerj-06-6071-s009.pdf]

|                     |                     |                                                                                                           |      |
|---------------------|---------------------|-----------------------------------------------------------------------------------------------------------|------|
| A                   | Bo9g018330.1        | GTAATTTTITTTTCATTTTATATAATAACACGCGTGACCATCAGATTAAAGTTTGAATTATCTCACGTGTATGTGTATATAAAAGAATGGTGGATTCTCA      | 100  |
|                     | GSBRNA2T00134741001 | GTAATTTTITTTTCATTTTATATAATAACACGCGTGACCATCAGATTAAAGTTTGAATTATCTCACGTGTATGTGTATATAAAAGAATGGTGGATTCTCA      | 100  |
| Consensus           |                     | gtaaatttttttcaatttttatataataaacacgcgctgcacatcagattaaagtttgaaattatctcacggtgatggtatataaaaagaatggtggattctca  |      |
| Bo9g018330.1        | Bo9g018330.1        | AAACACAAAACACTATTTTTCCTTCAATTTTTCACAAACTTCAAAATGAATCGTGAGATTTTGAACCATTATGATATAATGTTTTAAATAAATTTGTGATC     | 200  |
|                     | GSBRNA2T00134741001 | AAACACAAAACACTATTTTTCCTTCAATTTTTCACAAACTTCAAAATGAATCGTGAGATTTTGAACCATTATGATATAATGTTTTAAATAAATTTGTGATC     | 200  |
| Consensus           |                     | aaacacaaaactatttttccttcaattttttcaaaacttcaaatgaatcgtagattttgaaaccatttatgataaaatgttttaataaatttgtgatg        |      |
| Bo9g018330.1        | Bo9g018330.1        | TGGTAAACTATATACTCCCTCAGTTCCTTAAATGATAGATTTTGTAGAAAAAAATTTGTTTCACAAAAATGATTTTGTGTTTCTATAAAAAAAT            | 300  |
|                     | GSBRNA2T00134741001 | TGGTAAACTATATACTCCCTCAGTTCCTTAAATGATAGATTTTGTAGAAAAAAATTTGTTTCACAAAAATGATTTTGTGTTTCTATAAAAAAAT            | 297  |
| Consensus           |                     | tggtaaaactatatactccctcagttcctttaatgtagactttttagaaaaaaatttgtttcacaaaaatgtatattttttgattttctataaaaaaat       |      |
| Bo9g018330.1        | Bo9g018330.1        | TGTAAACTTCAAGAAAAATCAATTAACTTTTATGAATTACTATTGGTTTAAAGTTATTGAAAATTGAAAATTACAGAAAACGATACATTTATTATGGTAGT     | 400  |
|                     | GSBRNA2T00134741001 | TGTAAACTTCAAGAAAAATCAATTAACTTTTATGAATTACTATTGGTTTAAAGTTATTGAAAATTGAAAATTACAGAAAACGATACATTTATTATGGTAGT     | 397  |
| Consensus           |                     | tgtaaaactcaagaaaatcaatttaactttatgaaattactattgggttaaaagtatttgaaaattgaaaattacagaaaaacgatatacttattatggtagt   |      |
| Bo9g018330.1        | Bo9g018330.1        | TTAATGTGTTTTTCTTAATAATGTGTGAAATAGTAAAAAGTCTATTTTGTGAAACAGAGGGAGGTAGTATATACCGAGTGTATGAGTCACATCATATAAA      | 500  |
|                     | GSBRNA2T00134741001 | TTAATGTGTTTTTCTTAATAATGTGTGAAATAGTAAAAAGTCTATTTTGTGAAACAGAGGGAGGTAGTATATACCGAGTGTATGAGTCACATCATATAAA      | 497  |
| Consensus           |                     | ttaatgtgttttcttaatacgtgtgaaaaatagtaaaaaatctatttttgtgaacagagggagagagtatataccaagtgtagtgatcacatcataataa      |      |
| Bo9g018330.1        | Bo9g018330.1        | ACACAACATCTAAATATTGTCCTTTGTGTGTCTTATTGTTTAATTTTAATGAAAAGTTGCTCTTTTGTGCACTCATGCAATATACAAAACAACA            | 600  |
|                     | GSBRNA2T00134741001 | ACACAACATCTAAATATTGTCCTTTGTGTGTCTTATTGTTTAATTTTAATGAAAAGTTGCTCTTTTGTGCACTCATGCAATATACAAAACAACA            | 597  |
| Consensus           |                     | acacaacatctaaatatttgctcttttggttgtgctcttatttgtttaattttaatgaaaagttgctcttttgtgcaactcatgcaataataaaaaacaaa     |      |
| Bo9g018330.1        | Bo9g018330.1        | TAAAGAATAATCACAAATGTTTTTTTTTTCGGTTTCCTCTAGAAAATCCATGAGTTCCTTCATAAATGAGTTTTTTTTTTTCACAAGACTATCGAAGAACCAA   | 699  |
|                     | GSBRNA2T00134741001 | TAAAGAATAATCACAAATGTTTTTTTTTTCGGTTTCCTCTAGAAAATCCATGAGTTCCTTCATAAATGAGTTTTTTTTTTTCACAAGACTATCGAAGAACCAA   | 697  |
| Consensus           |                     | taaagaataatcacaaatgttttttttggtttccctctagaaaatccatgagttcttccataaatgagtttttttttcacaagactatcgaagaaccaa       |      |
| Bo9g018330.1        | Bo9g018330.1        | TGCATATAACCAAGTTTCCAAGTGATTTTTTTTTTGTGTTGAAAAAAATGGTTTAAATATTTCAATAAATAGTTTACGAAAAGTGTACTTGATTACCAGAAGACA | 798  |
|                     | GSBRNA2T00134741001 | TGCATATAACCAAGTTTCCAAGTGATTTTTTTTTTGTGTTGAAAAAAATGGTTTAAATATTTCAATAAATAGTTTACGAAAAGTGTACTTGATTACCAGAAGACA | 797  |
| Consensus           |                     | tgcataataaccaagtttccaagtgattttttttgtgttgaaaaaaatggtttaatatctcataaatagtttacgaaaagtgtaacttgattaccagaagaca   |      |
| Bo9g018330.1        | Bo9g018330.1        | TATACTTTGGGATTACAATAAGGTGCGGACAATTAACATATAGTGATGATGATATGCCAAAAGAATCTATCTCCCTCCATTTGCATAAAGAGTCTTTTCCAA    | 898  |
|                     | GSBRNA2T00134741001 | TATACTTTGGGATTACAATAAGGTGCGGACAATTAACATATAGTGATGATGATATGCCAAAAGAATCTATCTCCCTCCATTTGCATAAAGAGTCTTTTCCAA    | 897  |
| Consensus           |                     | tatactttgggattacaataaggtgcggacaattaaactatagtgatgatgatatgccaaaagaatctatctccctccatttgcataaagagtccttttcca    |      |
| Bo9g018330.1        | Bo9g018330.1        | CTTGCCCTTTTGTTTACTACTTGTTCATTGCGCCTTTGTCAACCCATTGGCCCTAATCACTTTGTCGTAATCACTGAACACTCTTTTGTGATTTTGTGTTTGT   | 998  |
|                     | GSBRNA2T00134741001 | CTTGCCCTTTTGTTTACTACTTGTTCATTGCGCCTTTGTCAACCCATTGGCCCTAATCACTTTGTCGTAATCACTGAACACTCTTTTGTGATTTTGTGTTTGT   | 997  |
| Consensus           |                     | cttgcccttttgtttactacttggttcatttgccctttgtcaccctattggccctaatacactttgtogtaataactgaacactcttttgattttgtttggttt  |      |
| Bo9g018330.1        | Bo9g018330.1        | TTAAGGATTTTCTCTTTTTTTTTTTTGTGCAAAACAGGATTTTCTCTTTATAATATCATTATTGAGTAGATTTAAAGAGAGTTATTAGTGAGCCAAAAC       | 1098 |
|                     | GSBRNA2T00134741001 | TTAAGGATTTTCTCTTTTTTTTTTTTGTGCAAAACAGGATTTTCTCTTTATAATATCATTATTGAGTAGATTTAAAGAGAGTTATTAGTGAGCCAAAAC       | 1095 |
| Consensus           |                     | ttaaggattttctcttttttttttttgtgcaaacaggatttctctttataatatcattatttgagttagatttaaagaaagttattagtgagccaaaac       |      |
| Bo9g018330.1        | Bo9g018330.1        | AAAAGTTTGAATTTATATGTTTGTGTTTGTGTTTGTGTTTCA                                                                | 1138 |
|                     | GSBRNA2T00134741001 | AAAAGTTTGAATTTATATGTTTGTGTTTGTGTTTGTGTTTCA                                                                | 1135 |
| Consensus           |                     | aaaagtttgaatttatatgttttgtgttggttgttttccaa                                                                 |      |
| B                   | Bo1015899           | .....ATGTGTGCCTTAAAAGTGGCAAAATCAGGAAGATAACGTTGGTAAAAAAGCCGAGCCTACCCTCGTGAAGATGATGATCACCGGACGT             | 88   |
|                     | GSBRNA2T00134741001 | GGAGAGAATTGTCTGTGTGCCTTAAAAGTGGCAAAATCAGGAAGATAACGTTGGTAAAAAAGCCGAGCCTACCCTCGTGAAGATGATGATCACCGGACGT      | 100  |
| Consensus           |                     | ggagagaattgtatgtgtgccttaaaagtgggcaaatcaggaagataaacgttggtaaaaaagccgagcctaccactcgtgaagatgatgatcacccggacgt   |      |
| Bo1015899           | Bo1015899           | TATCTGACATCGATCAATGGCTTTACTCATTTTCGGCGGAAGATGACCACCTCCACCCTCATAACTCCCTCACGCCCTCCTTCCTCGTCTCTTAGTATTAG     | 188  |
|                     | GSBRNA2T00134741001 | TATCTGACATCGATCAATGGCTTTACTCATTTTCGGCGGAAGATGACCACCTCCACCCTCATAACTCCCTCACGCCCTCCTTCCTCGTCTCTTAGTATTAG     | 200  |
| Consensus           |                     | tatctgacatcgatcaatggctttactcattttcggcggaagatgaccacctccaccgtcataactccctcacgcctccttctcgtctcttagtattag       |      |
| Bo1015899           | Bo1015899           | CAGAGAGAAAGAGATGTCTGCAATCGTCTCTGCTTTGACACATGTGCTGCTGGAATGTTTCTACTCTGTCAAATACGGTGGAGAAAGGGACGTGCAATTCT     | 288  |
|                     | GSBRNA2T00134741001 | CAGAGAGAAAGAGATGTCTGCAATCGTCTCTGCTTTGACACATGTGCTGCTGGAATGTTTCTACTCTGTCAAATACGGTGGAGAAAGGGACGTGCAATTCT     | 300  |
| Consensus           |                     | cagagagaaagagatgtctgcaatcgtctctgcttttgacacatgtcgctcggtggaatgttccctactcgtcaatacgggtggagaagggacgtgcaattct   |      |
| Bo1015899           | Bo1015899           | TCTTCTTCCCCCGGCCAGAAAAGGAGGAGAGAGGTGGAGGAAGGTGGCGGCGGTGGCAAAGACGTTAAGGCAGCTAATACTTTGACCGCTTGATCAATATT     | 388  |
|                     | GSBRNA2T00134741001 | TCTTCTTCCCCCGGCCAGAAAAGGAGGAGAGAGGTGGAGGAAGGTGGCGGCGGTGGCAAAGACGTTAAGGCAGCTAATACTTTGACCGCTTGATCAATATT     | 400  |
| Consensus           |                     | tcttcttcccccgccagaaaaggagagagaggtggaggaaggtggcgcggtggcgaagacgttaaggcagctaataactttgaccgttgatcaaatatt       |      |
| Bo1015899           | Bo1015899           | TCTCAGGCGGTAGTTCTAGTTTCAAA                                                                                | 414  |
|                     | GSBRNA2T00134741001 | TCTCAGGCGGTAGTTCTAGTTTCAAA                                                                                | 426  |
| Consensus           |                     | tctcaggcggtagttcttagttccaaa                                                                               |      |
| C                   | GSBRNA2T00134741001 | TGGGAGAAGCTTCGAGGCACATGTCAGGTTTACTGCCAACATATGAATACACAACAACGCCAAATGTCAATACAGAAACGTTGTTGTTAAGTGGGACGG       | 100  |
|                     | Bo1015899           | TGGGAGAAGCTTCGAGGCACATGTCAGGTTTACTGCCAACATATGAATACACAACAACGCCAAATGTCAATACAGAAACGTTGTTGTTAAGTGGGACGG       | 100  |
| Consensus           |                     | tgggagaagcttcgagcaacatgtcaggttcagtcccaacatatagaatacacacaacacgcgcaaatgtcaatacagaaaacgttggttgtaagtggggacgg  |      |
| GSBRNA2T00134741001 | Bo1015899           | ACCTCAAAGAAGATACAGAGGAGTGAGACAAAAGACCGTGGGAAAAATGGCGGCTGAGATTTCGAGATCCTTTCAAAGCGGCTAGAGTTTGGCTCGGTACA     | 200  |
|                     | Consensus           | acctcaaagaagatcacagaggagtgcagacaaaagaccgtgggaaaaatggacggctgagattcgagatccttccaagcggttagagtttggctcggtaca    | 200  |
| GSBRNA2T00134741001 | Bo1015899           | TTTGACAATGCTGAATCAGCTGCAAGAGCTTATGACGAAGCTGCTCTTCGGTTTAGAGGCAACAAAGCCAAACTTAACTTCCCTGAAAACGTTTAACTAG      | 300  |
|                     | Consensus           | tttgacaatgctgaatcagctgcgaagcttatgcagagctgtccttcggtttagaggccaacaaagccaaactaaactccctgaaaacgttaaaactag       | 300  |
| GSBRNA2T00134741001 | Bo1015899           | TTTCGACCAGCTTCAATCGCCCCAACACTATCTGTACATCAAACTGTTTCAGAGACCAACGAGTTAAGAAACTCGGGTTCTACAAGTACCCCTTTTGCC       | 400  |
|                     | Consensus           | tttcgaccagcttcaaacgccccaacactatctgtacagcaaacactgttcagagaccaacacagtttaagaaactcgggttctacaagtacccttttgcc     | 400  |
| GSBRNA2T00134741001 | Bo1015899           | CGTAAGACATGCTTCGGATCAAAACGTTCAATTCTCAGCTGTTGATGCAATCTTACAACCTTCAGTCACTTGGAGTTGGCTCATCACAACAACAATTTCA      | 500  |
|                     | Consensus           | cgtaagacatgcttcggatcaaaacgttcaattctcagctgttgatgcaatcttacaacttcagtcacttggagttggctcatcaccaacaacaatttcag     | 500  |
| GSBRNA2T00134741001 | Bo1015899           | CATCAACAACAATCTTTATATGATCAAGTGTCAATTTCATTGCGTTTGGTTCACACCGGAGGCTCAACGATGCAACCTACATCAACTTCTTCGTTCTCGTT     | 600  |
|                     | Consensus           | catcaacaacaactctttatagatcaagtgtaatttccattgcgcttttggtcacacccggaggctcaacgatgcaacctacatcaacttcttcgctcgtt     | 600  |
| GSBRNA2T00134741001 | Bo1015899           | CTACTTCTATGTTTTTCTCCGGCAGTAGTTCAACCAAGCTAGAAATCAGCTAGCGAAACCGATCGTCTACAGGATCTACACTCATTAGGCAAGGCTAGTAA     | 700  |
|                     | Consensus           | ctacttctatgttttctccggcagaagttcaaccaagctagaatcagctagcgaaacccgatcgtctacaggatctacaatcattaggaacggctagtaa      | 700  |
| GSBRNA2T00134741001 | Bo1015899           | TAATAATAACAACATATAATAATAGCCCATCCTCTTA                                                                     | 736  |
|                     | Consensus           | taataataacaactataataatagcccatcctctta                                                                      | 736  |
